# Supplementary material for: Bidirectional Associations between Parental Non-Responsive Feeding Practices and Child Eating Behaviors: A Systematic Review and Meta-Analysis of Longitudinal Prospective Studies
Source: MDPI journal article supplement (doi:10.3390/nu14091896), 2022-04-30
Supplement: s1 [file s1]

**Table S1. Quality appraisal by the JBI Critical Appraisal Checklist for Cohort Studies**

| <b>First author, year</b>  | <b>Q1</b> | <b>Q2</b> | <b>Q3</b> | <b>Q4</b> | <b>Q5</b> | <b>Q6</b> | <b>Q7</b> | <b>Q8</b> | <b>Q9</b> | <b>Q10</b> | <b>Q11</b> | <b>Overall quality rating</b> |
|----------------------------|-----------|-----------|-----------|-----------|-----------|-----------|-----------|-----------|-----------|------------|------------|-------------------------------|
| Jansen et al 2018 [14]     | NA        | NA        | Y         | Y         | Y         | NA        | Y         | Y         | N         | Y          | Y          | P                             |
| Jansen et al 2017 [31]     | NA        | NA        | Y         | Y         | Y         | NA        | Y         | Y         | N         | Y          | Y          | P                             |
| Lumeng et al 2018 [34]     | NA        | NA        | Y         | N         | N         | NA        | Y         | Y         | N         | Y          | Y          | M                             |
| Mallan et al 2018 [66]     | NA        | NA        | Y         | Y         | Y         | NA        | Y         | Y         | N         | Y          | Y          | P                             |
| Steinsbekk et al 2016 [32] | NA        | NA        | Y         | Y         | Y         | NA        | Y         | Y         | N         | Y          | Y          | P                             |
| Rodgers et al 2013 [30]    | NA        | NA        | Y         | N         | N         | NA        | Y         | Y         | N         | N          | Y          | M                             |
| Bergmeier et al 2015 [40]  | NA        | NA        | Y         | Y         | Y         | NA        | Y         | Y         | Y         | N          | Y          | P                             |
| Gregory et al 2010 [52]    | NA        | NA        | UN        | Y         | Y         | NA        | Y         | Y         | N         | Y          | Y          | P                             |
| Bjørklund et al 2018 [64]  | NA        | NA        | Y         | Y         | Y         | NA        | Y         | Y         | Y         | Y          | Y          | P                             |
| Bergmeier et al 2014 [67]  | NA        | NA        | Y         | Y         | Y         | NA        | Y         | Y         | Y         | Y          | Y          | P                             |
| Zohar et al 2020 [62]      | NA        | NA        | Y         | Y         | Y         | NA        | Y         | Y         | Y         | Y          | Y          | P                             |
| Jansen et al 2020 [53]     | NA        | NA        | Y         | Y         | Y         | NA        | Y         | Y         | N         | N          | Y          | M                             |
| Berge et al 2020 [63]      | NA        | NA        | Y         | Y         | Y         | NA        | Y         | Y         | Y         | Y          | Y          | P                             |
| Costa et al 2021[65]       | NA        | NA        | Y         | Y         | Y         | NA        | Y         | Y         | Y         | Y          | Y          | P                             |

*Notes.* N, negative study quality NA, not applicable; P, positive study quality; M, median study quality; UN, unclear; Y, yes.

Q1. Were the two groups similar and recruited from the same population?

Q2. Were the exposures measured similarly to assign people to both exposed and unexposed groups?

Q3. Was the exposure measured in a valid and reliable way?

Q4. Were confounding factors identified?

Q5. Were strategies to deal with confounding factors stated?

Q6. Were the groups/participants free of the outcome at the start of the study (or at the moment of exposure)?

Q7. Were the outcomes measured in a valid and reliable way?

Q8. Was the follow up time reported and sufficient to be long enough for outcomes to occur?

Q9. Was follow up complete, and if not, were the reasons to loss to follow up described and explored?

Q10. Were strategies to address incomplete follow up utilized?

Q11. Was appropriate statistical analysis used?

**Table S2. Longitudinal effects from parental non-responsive feeding practices to child eating behaviors (F→E)**

|                        | <b>Food fussiness (FF)</b>                                                                                                                                                                                                                                                                                                                                                                                                                                                                                                                                                                                                                                                                                                                                                    | <b>Food responsiveness</b>                                                                                                                                                                                                                                                                                                                                                                                                                                                                                                                                                                                                                                                                                        | <b>Satiety responsiveness</b>                                                                                                                                                                                                                                                                                                                                                                                                                                               | <b>Emotional eating</b>                                                             | <b>Enjoyment of food</b>                                                                                                                                                                                                                                                                                                                                                                                                                                                                                                                  |
|------------------------|-------------------------------------------------------------------------------------------------------------------------------------------------------------------------------------------------------------------------------------------------------------------------------------------------------------------------------------------------------------------------------------------------------------------------------------------------------------------------------------------------------------------------------------------------------------------------------------------------------------------------------------------------------------------------------------------------------------------------------------------------------------------------------|-------------------------------------------------------------------------------------------------------------------------------------------------------------------------------------------------------------------------------------------------------------------------------------------------------------------------------------------------------------------------------------------------------------------------------------------------------------------------------------------------------------------------------------------------------------------------------------------------------------------------------------------------------------------------------------------------------------------|-----------------------------------------------------------------------------------------------------------------------------------------------------------------------------------------------------------------------------------------------------------------------------------------------------------------------------------------------------------------------------------------------------------------------------------------------------------------------------|-------------------------------------------------------------------------------------|-------------------------------------------------------------------------------------------------------------------------------------------------------------------------------------------------------------------------------------------------------------------------------------------------------------------------------------------------------------------------------------------------------------------------------------------------------------------------------------------------------------------------------------------|
| <b>Restriction</b>     | $\phi(2 \text{ y-} 3.7 \text{ y}) [66] \beta = 0.06$<br>$\phi(3.7 \text{ y-} 5 \text{ y}) [66] \beta = -0.01$<br>$\phi(3.3 \text{ y-} 4.3 \text{ y}) [52] \beta = 0.04$<br>$\phi(3.09 \text{ y-} 4.09 \text{ y}) [40] \beta = \text{NR}$<br>$\phi(3 \text{ y-} 4 \text{ y}) [67] \beta = 0.03$<br>$\phi(3.3\text{y-}4.3\text{y})[63] \beta = -0.07, 95\% \text{ CI } (-0.14, 0.001)$<br>$\phi(4.3\text{y-}5.3\text{y})[63] \beta = -0.03, 95\% \text{ CI } (-0.10, 0.04)$<br>$\phi(5.3\text{y-}6.3\text{y})[63] \beta = -0.01, 95\% \text{ CI } (-0.08, 0.06)$<br>$\phi(4.3\text{y-}5.3\text{y})[62] \beta = -0.007, t = -0.07, P = 0.94$<br>$\phi(4 \text{ y-} 7 \text{ y})[65] \beta = 0.013, 95\% \text{ CI } (-0.017, 0.043)$                                             | $\phi(2 \text{ y-} 3.7 \text{ y}) [14] \beta = \text{NR}$<br>$\phi(3.7 \text{ y-} 5 \text{ y}) [14] \beta = \text{NR}$<br>$\phi(6 \text{ y-} 8 \text{ y}) [32] \beta = 0.04, 95\% \text{ CI } (-0.05, 0.13)$<br>$\phi(3.3 \text{ y-} 4.3 \text{ y}) [52] \beta = 0.06$<br>$\phi(6 \text{ y-} 8 \text{ y}) [64] \beta = 0.03, 95\% \text{ CI } (-0.07, 0.12)$<br>$\phi(3.3\text{y-}4.3\text{y})[63] \beta = 0.04, 95\% \text{ CI } (-0.04, 0.12)$<br>$\phi(4.3\text{y-}5.3\text{y})[63] \beta = 0.03, 95\% \text{ CI } (-0.05, 0.11)$<br>$\phi(5.3\text{y-}6.3\text{y})[63] \beta = 0.04, 95\% \text{ CI } (-0.03, 0.12)$<br>$\phi(4 \text{ y-} 7 \text{ y})[65] \beta = -0.011, 95\% \text{ CI } (-0.019, 0.041)$ | $\phi(2 \text{ y-} 3.7 \text{ y}) [14] \beta = \text{NR}$<br>$\phi(3.7 \text{ y-} 5 \text{ y}) [14] \beta = \text{NR}$<br>$\phi(6 \text{ y-} 8 \text{ y}) [32] \beta = 0.05, 95\% \text{ CI } (-0.07, 0.16)$<br>$\phi(3.3\text{y-}4.3\text{y})[63] \beta = -0.05, 95\% \text{ CI } (-0.13, 0.02)$<br>$\phi(4.3\text{y-}5.3\text{y})[63] \beta = -0.02, 95\% \text{ CI } (-0.09, 0.06)$<br>$\phi(5.3\text{y-}6.3\text{y})[63] \beta = -0.04, 95\% \text{ CI } (-0.12, 0.04)$ | $\phi(6 \text{ y-} 8 \text{ y}) [32] \beta = -0.04, 95\% \text{ CI } (-0.14, 0.07)$ | $\phi(6 \text{ y-} 8 \text{ y}) [32] \beta = 0.05, 95\% \text{ CI } (-0.06, 0.16)$<br>$\phi(3 \text{ y-} 4 \text{ y}) [67] \beta = 0.02$<br>$\phi(3.3 \text{ y-} 4.3 \text{ y}) [52] \beta = -0.02$<br>$-(2.9 \text{ y-} 3.9 \text{ y}) [40] \beta = -0.09, \text{ SE}: 0.04$<br>$\phi(3.3\text{y-}4.3\text{y})[63] \beta = 0.06, 95\% \text{ CI } (-0.01, 0.14)$<br>$\phi(4.3\text{y-}5.3\text{y})[63] \beta = 0.03, 95\% \text{ CI } (-0.05, 0.11)$<br>$\phi(5.3\text{y-}6.3\text{y})[63] \beta = 0.04, 95\% \text{ CI } (-0.03, 0.12)$ |
| <b>Pressure to eat</b> | $+(4 \text{ y-} 6 \text{ y}) [31] \beta = 0.17, 95\% \text{ CI } (0.14, 0.20)$<br>$\phi(21 \text{ m-} 27 \text{ m}) [34] \beta = 0.089 \text{ (FF Measure: CEBQ)}$<br>$\phi(27 \text{ m-} 33 \text{ m}) [34] \beta = 0.094 \text{ (FF Measure: CEBQ)}$<br>$\phi(21 \text{ m-} 27 \text{ m}) [34] \beta = 0.040 \text{ (FF Measure: BAMBI)}$<br>$\phi(27 \text{ m-} 33 \text{ m}) [34] \beta = 0.089 \text{ (FF Measure: BAMBI)}$<br>$\phi(3.3 \text{ y-} 4.3 \text{ y}) [52] \beta = 0.01$<br>$\phi(3.09 \text{ y-} 4.09 \text{ y}) [40] \beta = \text{NR}$<br>$\phi(3 \text{ y-} 4 \text{ y}) [67] \beta = 0.11$<br>$\phi(4.3\text{y-}5.3\text{y})[62] \beta = 0.08, t = 0.86, P = 0.39$<br>$+(4 \text{ y-} 7 \text{ y})[65] \beta = 0.033, 95\% \text{ CI } (0.022, 0.064)$ | $\phi(3.3 \text{ y-} 4.3 \text{ y}) [52] \beta = 0.00$<br>$+(4 \text{ y-} 7 \text{ y})[65] \beta = -0.096, 95\% \text{ CI } (-0.126, -0.065)$                                                                                                                                                                                                                                                                                                                                                                                                                                                                                                                                                                     |                                                                                                                                                                                                                                                                                                                                                                                                                                                                             |                                                                                     | $\phi(3 \text{ y-} 4 \text{ y}) [67] \beta = 0.04$<br>$-3(3.3 \text{ y-} 4.3 \text{ y}) [52] \beta = -0.25$<br>$-(2.9 \text{ y-} 3.9 \text{ y}) [40] \beta = -0.09, \text{ SE}: 0.07$                                                                                                                                                                                                                                                                                                                                                     |

|                      |                   | Food fussiness (FF)                                                                                                                                                                                                                                                                                                                     | Food responsiveness                                                                                                                                                                                                                                                                                                                                                                                                                                                                                        | Satiety responsiveness                                                                                                                                                                                                                                                                                                                                                                                                          | Emotional eating                                                                                                                                           | Enjoyment of food                                                                                                                                                                                                                                                                                                                               |
|----------------------|-------------------|-----------------------------------------------------------------------------------------------------------------------------------------------------------------------------------------------------------------------------------------------------------------------------------------------------------------------------------------|------------------------------------------------------------------------------------------------------------------------------------------------------------------------------------------------------------------------------------------------------------------------------------------------------------------------------------------------------------------------------------------------------------------------------------------------------------------------------------------------------------|---------------------------------------------------------------------------------------------------------------------------------------------------------------------------------------------------------------------------------------------------------------------------------------------------------------------------------------------------------------------------------------------------------------------------------|------------------------------------------------------------------------------------------------------------------------------------------------------------|-------------------------------------------------------------------------------------------------------------------------------------------------------------------------------------------------------------------------------------------------------------------------------------------------------------------------------------------------|
| Use food as a reward | Reward (behavior) | $\phi(2 \text{ y-}3.7 \text{ y}) [66] \beta = 0.02$<br>$+(3.7 \text{ y-} 5 \text{ y}) [66] \beta = 0.08$                                                                                                                                                                                                                                | $+(2 \text{ y-}3.7 \text{ y}) [14] \beta = 0.12^*, P=0.025$<br>$\phi(3.7 \text{ y-} 5 \text{ y}) [14] \beta = \text{NR}$                                                                                                                                                                                                                                                                                                                                                                                   | $\phi(2 \text{ y-} 3.7 \text{ y}) [14] \beta = \text{NR}$<br>$\phi(3.7 \text{ y-} 5 \text{ y}) [14] \beta = \text{NR}$                                                                                                                                                                                                                                                                                                          |                                                                                                                                                            |                                                                                                                                                                                                                                                                                                                                                 |
|                      | Reward (eating)   | $\phi(2 \text{ y-}3.7 \text{ y}) [66] \beta = -0.06$<br>$\phi(3.7 \text{ y-} 5 \text{ y}) [66] \beta = -0.02$                                                                                                                                                                                                                           | $\phi(2 \text{ y-} 3.7 \text{ y}) [14] \beta = \text{NR}$<br>$\phi(3.7 \text{ y-} 5 \text{ y}) [14] \beta = \text{NR}$                                                                                                                                                                                                                                                                                                                                                                                     | $\phi(2 \text{ y-} 3.7 \text{ y}) [14] \beta = \text{NR}$<br>$\phi(3.7 \text{ y-} 5 \text{ y}) [14] \beta = \text{NR}$                                                                                                                                                                                                                                                                                                          |                                                                                                                                                            |                                                                                                                                                                                                                                                                                                                                                 |
| Use food as a reward |                   | $+(4\text{-}9 \text{ y})[53] \beta = 0.06, 95\% \text{ CI } (0.03, 0.09)$<br>$\phi(3.3\text{y-}4.3\text{y})[63] \beta = 0.05, 95\% \text{ CI } (-0.02, 0.12)$<br>$\phi(4.3\text{y-}5.3\text{y})[63] \beta = -0.02, 95\% \text{ CI } (-0.09, 0.05)$<br>$\phi(5.3\text{y-}6.3\text{y})[63] \beta = -0.01, 95\% \text{ CI } (-0.08, 0.06)$ | $+(6 \text{ y-}8 \text{ y}) [32] \beta = 0.11, 95\% \text{ CI } (0.02, 0.20)$<br>$\phi(6 \text{ y-}8 \text{ y}) [64] \beta = -0.02, 95\% \text{ CI } (-0.12, 0.07)$<br>$\phi(4\text{-}9 \text{ y})[53] \beta = -0.02, 95\% \text{ CI } (-0.05, 0.016)$<br>$\phi(3.3\text{y-}4.3\text{y})[63] \beta = 0.06, 95\% \text{ CI } (-0.02, 0.14)$<br>$+(4.3\text{y-}5.3\text{y})[63] \beta = 0.10, 95\% \text{ CI } (0.01, 0.18)$<br>$+(5.3\text{y-}6.3\text{y})[63] \beta = 0.10, 95\% \text{ CI } (0.02, 0.18)$ | $\phi(6 \text{ y-}8 \text{ y}) [32] \beta = -0.01, 95\% \text{ CI } (-0.09, 0.08)$<br>$\phi(4\text{-}9 \text{ y})[53] \beta = 0.02, 95\% \text{ CI } (-0.01, 0.05)$<br>$\phi(3.3\text{y-}4.3\text{y})[63] \beta = 0.07, 95\% \text{ CI } (-0.01, 0.14)$<br>$\phi(4.3\text{y-}5.3\text{y})[63] \beta = 0.01, 95\% \text{ CI } (-0.07, 0.09)$<br>$\phi(5.3\text{y-}6.3\text{y})[63] \beta = 0.02, 95\% \text{ CI } (-0.05, 0.10)$ | $+(6 \text{ y-}8 \text{ y}) [32] \beta = 0.13, 95\% \text{ CI } (0.06, 0.20)$<br>$+(4\text{-}9 \text{ y})[53] \beta = 0.07, 95\% \text{ CI } (0.04, 0.11)$ | $\phi(6 \text{ y-}8 \text{ y}) [32] \beta = 0.06, 95\% \text{ CI } (-0.03, 0.14)$<br>$\phi(3.3\text{y-}4.3\text{y})[63] \beta = -0.05, 95\% \text{ CI } (-0.13, 0.02)$<br>$\phi(4.3\text{y-}5.3\text{y})[63] \beta = 0.03, 95\% \text{ CI } (-0.05, 0.11)$<br>$\phi(5.3\text{y-}6.3\text{y})[63] \beta = 0.001, 95\% \text{ CI } (-0.07, 0.08)$ |
| Emotional feeding    |                   | $\phi(3.3\text{y-}4.3\text{y})[63] \beta = 0.04, 95\% \text{ CI } (-0.04, 0.11)$<br>$\phi(4.3\text{y-}5.3\text{y})[63] \beta = -0.06, 95\% \text{ CI } (-0.13, 0.01)$<br>$\phi(5.3\text{y-}6.3\text{y})[63] \beta = -0.01, 95\% \text{ CI } (-0.08, 0.06)$                                                                              | $\phi(3.3\text{y-}4.3\text{y})[63] \beta = 0.03, 95\% \text{ CI } (-0.05, 0.12)$<br>$+(4.3\text{y-}5.3\text{y})[63] \beta = 0.10, 95\% \text{ CI } (0.02, 0.18)$<br>$+(5.3\text{y-}6.3\text{y})[63] \beta = 0.09, 95\% \text{ CI } (0.01, 0.17)$                                                                                                                                                                                                                                                           | $+(3.3\text{y-}4.3\text{y})[63] \beta = 0.08, 95\% \text{ CI } (0.005, 0.16)$<br>$-(4.3\text{y-}5.3\text{y})[63] \beta = -0.09, 95\% \text{ CI } (-0.17, -0.005)$<br>$\phi(5.3\text{y-}6.3\text{y})[63] \beta = 0.08, 95\% \text{ CI } (-0.004, 0.16)$                                                                                                                                                                          | $+(1.5 \text{ y-}2.5 \text{ y}) [30] \beta = 0.14, P = 0.012$                                                                                              | $\phi(3.3\text{y-}4.3\text{y})[63] \beta = -0.08, 95\% \text{ CI } (-0.16, 0.004)$<br>$\phi(4.3\text{y-}5.3\text{y})[63] \beta = 0.08, 95\% \text{ CI } (-0.01, 0.16)$<br>$\phi(5.3\text{y-}6.3\text{y})[63] \beta = 0.02, 95\% \text{ CI } (-0.06, 0.10)$                                                                                      |

**Notes.** FF: food fussiness. +positive association, -negative association,  $\phi$ non-significant association, NR not reported data

**Table S3. Longitudinal effects from child eating behaviors to parental non-responsive feeding practices (E→F)**

|                               | Restriction                                                                                                                                                                                                                                                                                                                                                                                                                                                                                                 | Pressure to eat                                                                                                                                                                                                                                                                                                                                                                                                                                                                                                  | Use food as a reward                                                                                                       |                                                                                                                            | Use food as a reward                                                                                                                                                                                                                                                                                                                                                         | Emotional feeding                                                                                                                                                                                                                                 |
|-------------------------------|-------------------------------------------------------------------------------------------------------------------------------------------------------------------------------------------------------------------------------------------------------------------------------------------------------------------------------------------------------------------------------------------------------------------------------------------------------------------------------------------------------------|------------------------------------------------------------------------------------------------------------------------------------------------------------------------------------------------------------------------------------------------------------------------------------------------------------------------------------------------------------------------------------------------------------------------------------------------------------------------------------------------------------------|----------------------------------------------------------------------------------------------------------------------------|----------------------------------------------------------------------------------------------------------------------------|------------------------------------------------------------------------------------------------------------------------------------------------------------------------------------------------------------------------------------------------------------------------------------------------------------------------------------------------------------------------------|---------------------------------------------------------------------------------------------------------------------------------------------------------------------------------------------------------------------------------------------------|
|                               |                                                                                                                                                                                                                                                                                                                                                                                                                                                                                                             |                                                                                                                                                                                                                                                                                                                                                                                                                                                                                                                  | Reward for eating                                                                                                          | Reward for behavior                                                                                                        |                                                                                                                                                                                                                                                                                                                                                                              |                                                                                                                                                                                                                                                   |
| <b>Food fussiness</b>         | $\phi(2 \text{ y-}3.7 \text{ y}) [66] \beta=0.04$<br>$\phi(3.7 \text{ y-}5 \text{ y}) [66] \beta=0.11$<br>$\phi(3.3\text{y-}4.3\text{y})[63] \beta=-0.01$ ,<br>95% CI (-0.09, 0.06)<br>$\phi(4.3\text{y-}5.3\text{y})[63] \beta=0.01$ ,<br>95% CI (-0.07, 0.08)<br>$\phi(5.3\text{y-}6.3\text{y})[63]$<br>$\beta=0.004$ , 95%CI (-0.07, 0.08)<br>$\phi(4 \text{ y-} 7 \text{ y})[65] \beta=-0.009$ ,<br>95% CI (-0.035, 0.018)                                                                              | $+ (1.5 \text{ y-}4 \text{ y}) [31] \beta=0.18$ ,<br>95% CI (0.15, 0.21)<br>$+ (3 \text{ y-}4 \text{ y}) [31] \beta=0.24$ , 95%<br>CI (0.21, 0.26)<br>$\phi(21\text{m-}27\text{m}) [34]\beta=0.030$<br>(Measure: CEBQ)<br>$\phi(27\text{m-}33\text{m}) [34]\beta=0.055$<br>(Measure: CEBQ)<br>$\phi(21\text{m-}27\text{m}) [34]\beta=0.003$<br>(Measure: BAMBI)<br>$\phi(27\text{m-}33\text{m}) [34]\beta=-0.016$<br>(Measure: BAMBI)<br>$+(4 \text{ y-} 7 \text{ y})[65]\beta=0.060$ , 95%<br>CI (0.034, 0.086) | $\phi(2 \text{ y-}3.7 \text{ y}) [66]$<br>$\beta=0.09$<br>$+ (3.7 \text{ y-}5 \text{ y}) [66]$<br>$\beta=0.13$             | $\phi(2 \text{ y-}3.7 \text{ y}) [66] \beta=-$<br>0.06<br>$\phi(3.7 \text{ y-}5 \text{ y}) [66]$<br>$\beta=0.04$           | $\phi(4\text{-}9 \text{ y})[53] \beta=0.03$ , 95% CI<br>(-0.01, 0.06)<br>$\phi(3.3\text{y-}4.3\text{y})[63] \beta=-0.01$ ,<br>95% CI (-0.09, 0.07)<br>$\phi(4.3\text{y-}5.3\text{y})[63] \beta=0.06$ , 95%<br>CI (-0.01, 0.14)<br>$\phi(5.3\text{y-}6.3\text{y})[63] \beta=-0.02$ ,<br>95%CI (-0.09, 0.05)                                                                   | $\phi(3.3\text{y-}4.3\text{y})[63]$<br>$\beta=0.02$ , 95% CI (-<br>0.04, 0.09)<br>$\phi(4.3\text{y-}5.3\text{y})[63] \beta=-$<br>0.05, 95% CI (-0.11, 0.02)<br>$-(5.3\text{y-}6.3\text{y})[63] \beta=-$<br>0.06, 95%CI (-0.12, -<br>0.01)         |
| <b>Food responsiveness</b>    | $\phi(2 \text{ y-}3.7 \text{ y}) [14] \beta=\text{NR}$<br>$\phi(3.7 \text{ y-}5 \text{ y}) [14] \beta=\text{NR}$<br>$\phi(6 \text{ y-}8 \text{ y}) [32] \beta=0.02$ ,<br>95% CI (-0.06, 0.09)<br>$\phi(3.3\text{y-}4.3\text{y})[63] \beta=0.04$ ,<br>95% CI (-0.04, 0.11)<br>$\phi(4.3\text{y-}5.3\text{y})[63] \beta=0.04$ ,<br>95% CI (-0.03, 0.12)<br>$\phi(5.3\text{y-}6.3\text{y})[63] \beta=0.03$ ,<br>95%CI (-0.05, 0.10)<br>$+(4 \text{ y-} 7 \text{ y})[65]\beta=0.047$ ,<br>95% CI (0.019, 0.075) | $-(4 \text{ y-} 7 \text{ y})[65] \beta=-0.044$ ,<br>95% CI (-0.071, -0.016)                                                                                                                                                                                                                                                                                                                                                                                                                                      | $\phi(2 \text{ y-}3.7 \text{ y}) [14]$<br>$\beta=\text{NR}$<br>$\phi(3.7 \text{ y-}5 \text{ y}) [14]$<br>$\beta=\text{NR}$ | $\phi(2 \text{ y-}3.7 \text{ y}) [14]$<br>$\beta=\text{NR}$<br>$\phi(3.7 \text{ y-}5 \text{ y}) [14]$<br>$\beta=\text{NR}$ | $\phi(6 \text{ y-}8 \text{ y}) [32]$<br>$\beta=0.07$ , 95% CI (-0.03, 0.17)<br>$+(4\text{-}9 \text{ y})[53] \beta=0.04$ , 95% CI<br>(0.01, 0.08)<br>$+(3.3\text{y-}4.3\text{y})[63] \beta=0.10$ , 95%<br>CI (0.03, 0.18)<br>$\phi(4.3\text{y-}5.3\text{y})[63] \beta=0.06$ ,<br>95% CI (-0.02, 0.14)<br>$+(5.3\text{y-}6.3\text{y})[63] \beta=0.10$ , 95%<br>CI (0.03, 0.18) | $\phi(3.3\text{y-}4.3\text{y})[63]$<br>$\beta=0.04$ , 95% CI (-<br>0.03, 0.10)<br>$\phi(4.3\text{y-}5.3\text{y})[63]$<br>$\beta=0.05$ , 95% CI (-<br>0.02, 0.11)<br>$\phi(5.3\text{y-}6.3\text{y})[63]$<br>$\beta=0.05$ , 95%CI (-<br>0.01, 0.10) |
| <b>Satiety responsiveness</b> | $\phi(2 \text{ y-}3.7 \text{ y}) [14] \beta=\text{NR}$<br>$+(3.7 \text{ y-}5 \text{ y}) [14] \beta=0.14$ ,<br>$P = 0.010$<br>$\phi(6 \text{ y-}8 \text{ y}) [32] \beta=-0.07$ ,<br>95% CI (-0.16, 0.01)                                                                                                                                                                                                                                                                                                     |                                                                                                                                                                                                                                                                                                                                                                                                                                                                                                                  | $\phi(2 \text{ y-}3.7 \text{ y}) [14]$<br>$\beta=\text{NR}$<br>$\phi(3.7 \text{ y-}5 \text{ y}) [14]$<br>$\beta=\text{NR}$ | $\phi(2 \text{ y-}3.7 \text{ y}) [14]$<br>$\beta=\text{NR}$<br>$\phi(3.7 \text{ y-}5 \text{ y}) [14]$<br>$\beta=\text{NR}$ | $\phi(6 \text{ y-}8 \text{ y}) [32]$<br>$\beta=0.05$ , 95% CI (-0.04, 0.13)<br>$\phi(4\text{-}9 \text{ y})[53] \beta=-0.01$ , 95% CI<br>(-0.04, 0.02)<br>$-(3.3\text{y-}4.3\text{y})[63] \beta=-0.08$ , 95%                                                                                                                                                                  | $\phi(3.3\text{y-}4.3\text{y})[63]$<br>$\beta=0.03$ , 95% CI (-<br>0.04, 0.09)<br>$\phi(4.3\text{y-}5.3\text{y})[63] \beta=-$<br>0.05, 95% CI (-0.12, 0.01)                                                                                       |

|                          | Restriction                                                                                                                                                                                                                                          | Pressure to eat | Use food as a reward |                     | Use food as a reward                                                                                                                                                                                                                               | Emotional feeding                                                                                                                                                                              |
|--------------------------|------------------------------------------------------------------------------------------------------------------------------------------------------------------------------------------------------------------------------------------------------|-----------------|----------------------|---------------------|----------------------------------------------------------------------------------------------------------------------------------------------------------------------------------------------------------------------------------------------------|------------------------------------------------------------------------------------------------------------------------------------------------------------------------------------------------|
|                          |                                                                                                                                                                                                                                                      |                 | Reward for eating    | Reward for behavior |                                                                                                                                                                                                                                                    |                                                                                                                                                                                                |
|                          | $\phi(3.3y-4.3y)[63] \beta=-0.06$ ,<br>95% CI (-0.14, 0.01)<br>$\phi(4.3y-5.3y)[63] \beta=-0.01$ ,<br>95% CI (-0.08, 0.06)<br>$\phi(5.3y-6.3y)[63] \beta=-0.05$ ,<br>95%CI (-0.13, 0.02)                                                             |                 |                      |                     | CI (-0.15, -0.0004)<br>$\phi(4.3y-5.3y)[63] \beta=0.04$ , 95%<br>CI (-0.04, 0.11)<br>$\phi(5.3y-6.3y)[63] \beta=0.01$ ,<br>95%CI (-0.07, 0.08)                                                                                                     | $\phi(5.3y-6.3y)[63] \beta=0.01$ , 95% CI (-<br>0.05, 0.07)                                                                                                                                    |
| <b>Enjoyment of food</b> | $\phi(6 y-8 y) [32] \beta=-0.02$ ,<br>95% CI (-0.09, 0.05)<br>$\phi(3.3y-4.3y)[63] \beta=0.05$ ,<br>95% CI (-0.02, 0.13)<br>$\phi(4.3y-5.3y)[63] \beta=-0.01$ ,<br>95% CI (-0.08, 0.07)<br>$\phi(5.3y-6.3y)[63] \beta=0.04$ ,<br>95%CI (-0.03, 0.12) |                 |                      |                     | $\phi(6 y-8 y) [32] \beta=0.02$ , 95%<br>CI (-0.06, 0.11)<br>$\phi(3.3y-4.3y)[63] \beta=0.04$ , 95%<br>CI (-0.04, 0.12)<br>$\phi(4.3y-5.3y)[63] \beta=-0.04$ ,<br>95% CI (-0.12, 0.03)<br>$\phi(5.3y-6.3y)[63] \beta=0.08$ ,<br>95%CI (0.01, 0.15) | $\phi(3.3y-4.3y)[63] \beta=-$<br>0.003, 95% CI (-<br>0.07, 0.06)<br>$\phi(4.3y-5.3y)[63] \beta=0.06$ , 95% CI (-<br>0.001, 0.13)<br>$\phi(5.3y-6.3y)[63] \beta=0.03$ , 95%CI (-<br>0.02, 0.09) |
| <b>Emotional eating</b>  | $\phi(6 y-8 y) [32] \beta=-0.08$ ,<br>95% CI (-0.16, 0.00)                                                                                                                                                                                           |                 |                      |                     | $\phi(6 y-8 y) [32] \beta=-0.02$ , 95%<br>CI (-0.13, 0.09)<br>$\phi(4-9 y)[53] \beta=0.06$ , 95% CI<br>(0.03, 0.09)                                                                                                                                | $\phi(1.5 y-2.5 y) [30] \beta=0.13$ , $P=0.047$                                                                                                                                                |

**Notes.** +positive association, -negative association,  $\phi$ non-significant association, NR not reported data.
